# Supplementary material
Source: publisher figshare collection journal article supplement (https://acs.figshare.com/ndownloader/files/5184253)
Supplement: Supplementary file 1 [file 5184253]

**1. Chemistry.** Melting points were determined using a Reichert K f ler hot-stage apparatus and are uncorrected. Infrared spectra were recorded with a Nicolet-Avatar 360 FT-IR spectrophotometer in Nujol mulls. Routine nuclear magnetic resonance spectra were recorded in DMSO-d<sub>6</sub> solution on a Varian Gemini 200 spectrometer operating at 200 MHz. Evaporation was performed in vacuo (rotary evaporator). Analytical TLC was carried out on Merck 0.2 mm precoated silica gel aluminum sheets (60 F-254). Elemental analyses were performed by our Analytical Laboratory and agreed with theoretical values to within  $\pm 0.4\%$ .

2-Phenylindole **32** was from Sigma-Aldrich; 2-(4-fluorophenyl)indole **34** was from Lancaster. Compounds **28**,<sup>1</sup> **29**,<sup>2</sup> **30**,<sup>3</sup> and **31**,<sup>4</sup> were prepared in accordance with reported procedures.

**General Procedure for the Synthesis of 5-Substituted-2-(4-substitutedphenyl)indole Derivatives 33, 35-37.** A stirred solution of 50 mmol of the appropriate benzamide **28-31** (3-6) in 25 mL of dry THF, maintained under an N<sub>2</sub> atmosphere and at an internal temperature of -25 to 0 C, was treated dropwise with 9.3 mL (15 mmol) of n-BuLi (1.6 M solution in hexane). The stirred mixture was kept at room temperature for 24-48 h (TLC analysis), cooled in an ice bath and acidified to pH = 5-6 with diluted HCl. The organic layer was separated and the aqueous phase was extracted with CH<sub>2</sub>Cl<sub>2</sub>. After drying (MgSO<sub>4</sub>), the combined organic phases were evaporated to dryness, furnishing the crude indoles **33, 35-37**, which were purified by flash-chromatography (eluting system: cyclohexane-ethyl acetate in varying ratios) and/or by recrystallization from the appropriate solvent.

**2-(4-Chlorophenyl)indole 33.** Yield: 85%. Mp: 202-204  C (cyclohexane) (lit. 5, mp: 208-211  C).

**2-(4-Methylphenyl)indole 35.** Yield: 75%. Mp: 215-218  C (ethyl acetate) (lit. 6, mp: 219-219.5  C).

**5-Chloro-2-phenylindole 36.** Yield: 88%. Mp: 192-194  C (toluene) (lit. 3, mp: 195-196  C).

**5-Chloro-2-(4-chlorophenyl)indole 37.** Yield: 80%. Mp: 190-192  C (lit. 4).

**General Procedure for the Synthesis of [5-Substituted-2-(4-substitutedphenyl)indol-3-yl]glyoxylyl Chloride Derivatives 38-43.** Oxalyl chloride (0.12 mL, 1.4 mmol) was added dropwise, at 0 °C, to a well-stirred mixture of the appropriate indole **32-37** (1.0 mmol) in 5 mL di anhydrous ethyl ether. The reaction was maintained at room temperature for 1-2 h (TLC analysis). The precipitate formed was collected and washed with portions of anhydrous ethyl ether to give the acid chlorides **38-43**, which were directly used for the next reaction.

**(2-Phenylindol-3-yl)glyoxylyl chloride 38.** Yield: 68%. Mp: 132-134 °C (lit. 7, mp: 132-135 °C).

**[2-(4-Chlorophenyl)indol-3-yl]glyoxylyl chloride 39.** Yield: 96%. Mp: 113-115 °C.

**[2-(4-Fluorophenyl)indol-3-yl]glyoxylyl chloride 40.** Yield: 73%. Mp: 189-190 °C (lit. 8, mp: 145 °C).

**[2-(4-Methylphenyl)indol-3-yl]glyoxylyl chloride 41.** Yield: 83%. Mp: 194-198 °C.

**(5-Chloro-2-phenylindol-3-yl)glyoxylyl chloride 42.** Yield: 67%. Mp: 116-118 °C (lit. 9, mp: 118-120 °C).

**[5-Chloro-2-(4-chlorophenyl)indol-3-yl]glyoxylyl chloride 43.** Yield: 65%. Mp: 125-128 °C.

TABLE 1. Physical Properties of Compounds 1-27.

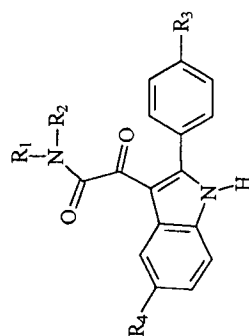

| n. | R <sub>1</sub>                                      | R <sub>2</sub>                                      | R <sub>3</sub> | R <sub>4</sub> | yield,<br>(%) | recryst.<br>solvent          | mp,<br>(°C) | formula <sup>a</sup>                                          |
|----|-----------------------------------------------------|-----------------------------------------------------|----------------|----------------|---------------|------------------------------|-------------|---------------------------------------------------------------|
| 1  | (CH <sub>2</sub> ) <sub>2</sub> CH <sub>3</sub>     | H                                                   | H              | H              | 55            | benzene                      | 218-220     | C <sub>19</sub> H <sub>18</sub> N <sub>2</sub> O <sub>2</sub> |
| 2  | (CH <sub>2</sub> ) <sub>3</sub> CH <sub>3</sub>     | H                                                   | H              | H              | 55            | toluene                      | 209-210     | C <sub>20</sub> H <sub>20</sub> N <sub>2</sub> O <sub>2</sub> |
| 3  | CH <sub>2</sub> CH <sub>3</sub>                     | CH <sub>2</sub> CH <sub>3</sub>                     | H              | H              | 54            | toluene                      | 142-145     | C <sub>20</sub> H <sub>20</sub> N <sub>2</sub> O <sub>2</sub> |
| 4  | (CH <sub>2</sub> ) <sub>2</sub> CH <sub>3</sub>     | (CH <sub>2</sub> ) <sub>2</sub> CH <sub>3</sub>     | H              | H              | 50            | petroleum benzine<br>60-80°C | 124-126     | C <sub>22</sub> H <sub>24</sub> N <sub>2</sub> O <sub>2</sub> |
| 5  | (CH <sub>2</sub> ) <sub>3</sub> CH <sub>3</sub>     | (CH <sub>2</sub> ) <sub>3</sub> CH <sub>3</sub>     | H              | H              | 62            |                              | oil         | C <sub>24</sub> H <sub>28</sub> N <sub>2</sub> O <sub>2</sub> |
| 6  | (CH <sub>2</sub> ) <sub>4</sub> CH <sub>3</sub>     | (CH <sub>2</sub> ) <sub>4</sub> CH <sub>3</sub>     | H              | H              | 85            |                              | oil         | C <sub>26</sub> H <sub>32</sub> N <sub>2</sub> O <sub>2</sub> |
| 7  | (CH <sub>2</sub> ) <sub>5</sub> CH <sub>3</sub>     | (CH <sub>2</sub> ) <sub>5</sub> CH <sub>3</sub>     | H              | H              | 59            |                              | oil         | C <sub>28</sub> H <sub>36</sub> N <sub>2</sub> O <sub>2</sub> |
| 8  | CH(CH <sub>3</sub> ) <sub>2</sub>                   | CH(CH <sub>3</sub> ) <sub>2</sub>                   | H              | H              | 67            | petroleum benzine<br>60-80°C | 125-128     | C <sub>22</sub> H <sub>24</sub> N <sub>2</sub> O <sub>2</sub> |
| 9  | CH(CH <sub>3</sub> )CH <sub>2</sub> CH <sub>3</sub> | CH(CH <sub>3</sub> )CH <sub>2</sub> CH <sub>3</sub> | H              | H              | 55            |                              | 154-156     | C <sub>24</sub> H <sub>28</sub> N <sub>2</sub> O <sub>2</sub> |
| 10 |                                                     | -(CH <sub>2</sub> ) <sub>4</sub> -                  | H              | H              | 71            | toluene                      | 217-221     | C <sub>20</sub> H <sub>18</sub> N <sub>2</sub> O <sub>2</sub> |



TABLE 2. Spectral Data of Compounds 1-27.

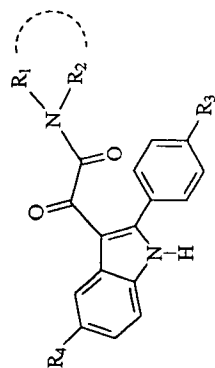

| n. | R <sub>1</sub>                                  | R <sub>2</sub>                  | R <sub>3</sub> | R <sub>4</sub> | <sup>1</sup> H-NMR<br>(δ ppm)                                                                                                                                                                                                                                                                                                                                                                                                 | IR<br>(cm <sup>-1</sup> )          |
|----|-------------------------------------------------|---------------------------------|----------------|----------------|-------------------------------------------------------------------------------------------------------------------------------------------------------------------------------------------------------------------------------------------------------------------------------------------------------------------------------------------------------------------------------------------------------------------------------|------------------------------------|
| 1  | (CH <sub>2</sub> ) <sub>2</sub> CH <sub>3</sub> | H                               | H              | H              | 0.76 (t, 3H, <i>J</i> =7.4Hz, CH <sub>3</sub> ); 1.19-1.26 (m, 2H, CH <sub>2</sub> CH <sub>2</sub> CH <sub>3</sub> ); 2.66-2.74 (m, 2H, CH <sub>2</sub> CH <sub>2</sub> CH <sub>3</sub> ); 7.23-7.27 (m, 2H, 5-H, 6-H); 7.46-7.55 (m, 6H, Ar-H); 8.05-8.10 (m, 1H, 4-H); 8.49 (t, 1H, <i>J</i> =5.6Hz, CONH, exch. with D <sub>2</sub> O).                                                                                    | 3350, 3100, 1645, 1590, 1420, 740. |
| 2  | (CH <sub>2</sub> ) <sub>3</sub> CH <sub>3</sub> | H                               | H              | H              | 0.82 (t, 3H, <i>J</i> =6.2Hz, CH <sub>3</sub> ); 1.17-1.19 (m, 4H, CH <sub>2</sub> (CH <sub>2</sub> ) <sub>2</sub> CH <sub>3</sub> ); 2.72-2.75 (m, 2H, CH <sub>2</sub> (CH <sub>2</sub> ) <sub>2</sub> CH <sub>3</sub> ); 7.23-7.28 (m, 2H, 5-H, 6-H); 7.46-7.52 (m, 6H, Ar-H); 8.06-8.10 (m, 1H, 4-H); 8.43 (t, 1H, <i>J</i> =5.3Hz, CONH, exch. with D <sub>2</sub> O); 12.38 (bs, 1H, 1-NH, exch. with D <sub>2</sub> O). | 3400, 3160, 1660, 1600, 1420, 740. |
| 3  | CH <sub>2</sub> CH <sub>3</sub>                 | CH <sub>2</sub> CH <sub>3</sub> | H              | H              | 0.78 (t, 3H, <i>J</i> =7.1Hz, CH <sub>3</sub> ); 1.01 (t, 3H, <i>J</i> =6.9Hz, CH <sub>3</sub> ); 3.00 (q, 2H, <i>J</i> =7.0Hz, CH <sub>2</sub> ); 3.14 (q, 2H, <i>J</i> =7.0Hz, CH <sub>2</sub> ); 7.25-7.29 (m, 2H, 5-H, 6-H); 7.46-7.59 (m, 6H, Ar-H); 8.07-8.11 (m, 1H, 4-H); 12.42 (bs, 1H, NH, exch. with D <sub>2</sub> O).                                                                                            | 3175, 1610, 1580, 1420, 1075, 740. |

|   |                              |                              |   |   |                                                                                                                                                                                                                                                                                                                                                                                                                                                                                                                                                        |                                    |
|---|------------------------------|------------------------------|---|---|--------------------------------------------------------------------------------------------------------------------------------------------------------------------------------------------------------------------------------------------------------------------------------------------------------------------------------------------------------------------------------------------------------------------------------------------------------------------------------------------------------------------------------------------------------|------------------------------------|
| 4 | $(\text{CH}_2)_2\text{CH}_3$ | $(\text{CH}_2)_2\text{CH}_3$ | H | H | 0.65-0.78 (m, 6H, 2 CH <sub>3</sub> ); 1.17-1.24 (m, 2H, CH <sub>2</sub> CH <sub>2</sub> CH <sub>3</sub> ); 1.39-1.46 (m, 2H, CH <sub>2</sub> CH <sub>2</sub> CH <sub>3</sub> ); 2.90 (t, 2H, <i>J</i> =7.8Hz, CH <sub>2</sub> CH <sub>2</sub> CH <sub>3</sub> ); 3.03 (t, 2H, <i>J</i> =7.6Hz, CH <sub>2</sub> CH <sub>2</sub> CH <sub>3</sub> ); 7.24-7.28 (m, 2H, 5-H, 6-H); 7.46-7.57 (m, 6H, Ar-H); 8.03-8.07 (m, 1H, 4-H).                                                                                                                       | 3170, 1610, 1580, 1420, 1075, 740. |
| 5 | $(\text{CH}_2)_3\text{CH}_3$ | $(\text{CH}_2)_3\text{CH}_3$ | H | H | 0.69-0.87 (m, 6H, 2 CH <sub>3</sub> ); 1.04-1.40 (m, 8H, 2 CH <sub>2</sub> (CH <sub>2</sub> ) <sub>2</sub> CH <sub>3</sub> ); 2.94-3.09 (m, 4H, 2 CH <sub>2</sub> (CH <sub>2</sub> ) <sub>2</sub> CH <sub>3</sub> ); 7.21-7.32 (m, 2H, 5-H, 6-H); 7.46-7.63 (m, 6H, Ar-H); 8.04-8.08 (m, 1H, 4-H); 12.43 (bs, 1H, NH, exch. with D <sub>2</sub> O).                                                                                                                                                                                                    | 3200, 1620, 1590, 1420, 1100, 740. |
| 6 | $(\text{CH}_2)_4\text{CH}_3$ | $(\text{CH}_2)_4\text{CH}_3$ | H | H | 0.71-0.86 (m, 6H, 2 CH <sub>3</sub> ); 1.24-1.45 (m, 8H, 2 CH <sub>2</sub> CH <sub>2</sub> (CH <sub>2</sub> ) <sub>2</sub> CH <sub>3</sub> ); 1.57-1.63 (m, 4H, 2 CH <sub>2</sub> CH <sub>2</sub> (CH <sub>2</sub> ) <sub>2</sub> CH <sub>3</sub> ); 2.92-3.08 (m, 4H, 2 CH <sub>2</sub> CH <sub>2</sub> (CH <sub>2</sub> ) <sub>2</sub> CH <sub>3</sub> ); 7.24-7.27 (m, 2H, 5-H, 6-H); 7.47-7.63 (m, 6H, Ar-H); 7.99-8.03 (m, 1H, 4-H); 12.40 (bs, 1H, NH, exch. with D <sub>2</sub> O).                                                             | 3200, 1610, 1580, 1420, 1100, 750. |
| 7 | $(\text{CH}_2)_5\text{CH}_3$ | $(\text{CH}_2)_5\text{CH}_3$ | H | H | 0.82 (t, 3H, <i>J</i> =6.6Hz, CH <sub>3</sub> ); 0.90 (t, 3H, <i>J</i> =6.4Hz, CH <sub>3</sub> ); 1.06-1.27 (m, 12H, 2 CH <sub>2</sub> CH <sub>2</sub> (CH <sub>2</sub> ) <sub>3</sub> CH <sub>3</sub> ); 1.33-1.42 (m, 4H, 2 CH <sub>2</sub> CH <sub>2</sub> (CH <sub>2</sub> ) <sub>3</sub> CH <sub>3</sub> ); 2.94-3.19 (m, 4H, 2 CH <sub>2</sub> CH <sub>2</sub> (CH <sub>2</sub> ) <sub>3</sub> CH <sub>3</sub> ); 7.23-7.31 (m, 2H, 5-H, 6-H); 7.49-7.61 (m, 6H, Ar-H); 8.03-8.07 (m, 1H, 4-H); 12.44 (bs, 1H, NH, exch. with D <sub>2</sub> O). | 3200, 1615, 1580, 1420, 1100, 750. |
| 8 | $\text{CH}(\text{CH}_3)_2$   | $\text{CH}(\text{CH}_3)_2$   | H | H | 0.98 (d, 6H, <i>J</i> =6.6Hz, CH(CH <sub>3</sub> ) <sub>2</sub> ); 1.13 (d, 6H, <i>J</i> =6.6Hz, CH(CH <sub>3</sub> ) <sub>2</sub> ); 3.32-3.38 (m, 1H, CH); 3.61-3.68 (m, 1H, CH); 7.24-7.29 (m, 2H, 5-H, 6-H); 7.45-7.51 (m, 4H, Ar-H); 7.62-7.65 (m, 2H, Ar-H); 8.09-8.13 (m, 1H, 4-H); 12.42 (bs, 1H, NH, exch. with D <sub>2</sub> O).                                                                                                                                                                                                            | 3200, 1620, 1590, 1420, 1140, 750. |

|    |                                                     |                                                     |    |   |                                                                                                                                                                                                                                                                                                                                                                                                                                                                                                        |                                    |
|----|-----------------------------------------------------|-----------------------------------------------------|----|---|--------------------------------------------------------------------------------------------------------------------------------------------------------------------------------------------------------------------------------------------------------------------------------------------------------------------------------------------------------------------------------------------------------------------------------------------------------------------------------------------------------|------------------------------------|
| 9  | CH(CH <sub>3</sub> )CH <sub>2</sub> CH <sub>3</sub> | CH(CH <sub>3</sub> )CH <sub>2</sub> CH <sub>3</sub> | H  | H | 0.64 (t, 3H, <i>J</i> =7.3 Hz, CH <sub>2</sub> CH <sub>3</sub> ); 0.78 (t, 3H, <i>J</i> =7.5 Hz, CH <sub>2</sub> CH <sub>3</sub> ); 1.07 (d, 3H, <i>J</i> =6.6 Hz, CHCH <sub>3</sub> ); 1.14 (d, 3H, <i>J</i> =6.6 Hz, CHCH <sub>3</sub> ); 1.43-1.60 (m, 2H, CH <sub>2</sub> ); 1.71-1.89 (m, 2H, CH <sub>2</sub> ); 2.94-3.05 (m, 2H, 2 CH); 7.23-7.28 (m, 2H, 5-H, 6-H); 7.45-7.52 (m, 4H, Ar-H); 7.63-7.68 (m, 2H, Ar-H); 8.06-8.11 (m, 1H, 4-H); 12.42 (bs, 1H, NH, exch. with D <sub>2</sub> O). | 3150, 1610, 1580, 1420, 1190, 750. |
| 10 | -(CH <sub>2</sub> ) <sub>4</sub> -                  | -(CH <sub>2</sub> ) <sub>4</sub> -                  | H  | H | 1.54-1.72 (m, 4H, CH <sub>2</sub> (CH <sub>2</sub> ) <sub>2</sub> CH <sub>2</sub> ); 2.79 (t, 2H, <i>J</i> =6.4 Hz, CH <sub>2</sub> N); 3.21 (t, 2H, <i>J</i> =6.8 Hz, CH <sub>2</sub> N); 7.22-7.36 (m, 2H, 5-H, 6-H); 7.46-7.51 (m, 6H, Ar-H); 8.14-8.18 (m, 1H, 4-H); 12.45 (bs, 1H, NH, exch. with D <sub>2</sub> O).                                                                                                                                                                              | 3200, 1630, 1590, 1410, 1180, 750. |
| 11 | -(CH <sub>2</sub> ) <sub>5</sub> -                  | -(CH <sub>2</sub> ) <sub>5</sub> -                  | H  | H | 1.18-1.46 (m, 6H, CH <sub>2</sub> (CH <sub>2</sub> ) <sub>3</sub> CH <sub>2</sub> ); 3.01-3.11 (m, 4H, CH <sub>2</sub> NCH <sub>2</sub> ); 7.23-7.30 (m, 2H, 5-H, 6-H); 7.41-7.59 (m, 6H, Ar-H); 8.12-8.16 (m, 1H, 4-H); 12.48 (bs, 1H, NH, exch. with D <sub>2</sub> O).                                                                                                                                                                                                                              | 3200, 1620, 1590, 1420, 1100, 750. |
| 12 | -(CH <sub>2</sub> ) <sub>6</sub> -                  | -(CH <sub>2</sub> ) <sub>6</sub> -                  | H  | H | 1.28-1.51 (m, 8H, CH <sub>2</sub> (CH <sub>2</sub> ) <sub>4</sub> CH <sub>2</sub> ); 2.94 (t, 2H, <i>J</i> =5.4 Hz, CH <sub>2</sub> N); 3.19 (t, 2H, <i>J</i> =5.5 Hz, CH <sub>2</sub> N); 7.25-7.29 (m, 2H, 5-H, 6-H); 7.46-7.58 (m, 6H, Ar-H); 8.11-8.16 (m, 1H, 4-H); 12.46 (bs, 1H, NH, exch. with D <sub>2</sub> O).                                                                                                                                                                              | 3190, 1620, 1590, 1420, 1100, 750. |
| 13 | (CH <sub>2</sub> ) <sub>2</sub> CH <sub>3</sub>     | (CH <sub>2</sub> ) <sub>2</sub> CH <sub>3</sub>     | Cl | H | 0.63-0.81 (m, 6H, 2 CH <sub>3</sub> ); 1.15-1.29 (m, 2H, CH <sub>2</sub> CH <sub>2</sub> CH <sub>3</sub> ); 1.39-1.50 (m, 2H, CH <sub>2</sub> CH <sub>2</sub> CH <sub>3</sub> ); 2.92-3.07 (m, 4H, 2 CH <sub>2</sub> CH <sub>2</sub> CH <sub>3</sub> ); 7.24-7.27 (m, 2H, 5-H, 6-H); 7.47-7.60 (m, 5H, Ar-H); 8.02-8.05 (m, 1H, 4-H); 12.50 (bs, 1H, NH, exch. with D <sub>2</sub> O).                                                                                                                 | 3200, 1615, 1580, 1420, 1090, 750. |
| 14 | (CH <sub>2</sub> ) <sub>3</sub> CH <sub>3</sub>     | (CH <sub>2</sub> ) <sub>3</sub> CH <sub>3</sub>     | Cl | H | 0.73 (t, 3H, <i>J</i> =7.2 Hz, CH <sub>3</sub> ); 0.87 (t, 3H, <i>J</i> =6.3 Hz, CH <sub>3</sub> ); 1.00-1.49 (m, 8H, 2 CH <sub>2</sub> (CH <sub>2</sub> ) <sub>2</sub> CH <sub>3</sub> ); 2.96-3.08 (m, 4H, 2 CH <sub>2</sub> (CH <sub>2</sub> ) <sub>2</sub> CH <sub>3</sub> ); 7.22-7.33 (m, 2H, 5-H, 6-H); 7.45-7.64 (m, 5H, Ar-H); 8.04-8.08 (m, 1H, 4-H); 12.47 (bs, 1H, NH, exch. with D <sub>2</sub> O).                                                                                       | 3220, 1610, 1570, 1440, 1100, 750. |

|    |                              |                              |               |   |                                                                                                                                                                                                                                                                                                                                                                                     |                                    |
|----|------------------------------|------------------------------|---------------|---|-------------------------------------------------------------------------------------------------------------------------------------------------------------------------------------------------------------------------------------------------------------------------------------------------------------------------------------------------------------------------------------|------------------------------------|
| 15 | $(\text{CH}_2)_5\text{CH}_3$ | $(\text{CH}_2)_5\text{CH}_3$ | Cl            | H | 0.74 (t, 3H, $J=6.5\text{Hz}$ , $\text{CH}_3$ ); 0.87 (t, 3H, $J=6.4\text{Hz}$ , $\text{CH}_3$ ); 1.07-1.40 (m, 16H, 2 $\text{CH}_2(\text{CH}_2)_4\text{CH}_3$ ); 3.00-3.07 (m, 4H, 2 $\text{CH}_2(\text{CH}_2)_4\text{CH}_3$ ); 7.24-7.30 (m, 2H, 5-H, 6-H); 7.47-7.64 (m, 5H, Ar-H); 8.04-8.07 (m, 1H, 4-H); 12.50 (bs, 1H, NH, exch. with $\text{D}_2\text{O}$ ).                | 3230, 1615, 1570, 1420, 1100, 740. |
| 16 | $(\text{CH}_2)_2\text{CH}_3$ | $(\text{CH}_2)_2\text{CH}_3$ | F             | H | 0.65-0.80 (m, 6H, 2 $\text{CH}_3$ ); 1.18-1.30 (m, 2H, $\text{CH}_2\text{CH}_2\text{CH}_3$ ); 1.39-1.51 (m, 2H, $\text{CH}_2\text{CH}_2\text{CH}_3$ ); 2.91-3.07 (m, 4H, 2 $\text{CH}_2\text{CH}_2\text{CH}_3$ ); 7.20-7.70 (m, 7H, Ar-H); 8.01-8.06 (m, 1H, 4-H); 12.50 (bs, 1H, NH, exch. with $\text{D}_2\text{O}$ ).                                                            | 3250, 1610, 1590, 1420, 1100, 760. |
| 17 | $(\text{CH}_2)_3\text{CH}_3$ | $(\text{CH}_2)_3\text{CH}_3$ | F             | H | 0.72 (t, 3H, $J=7.3\text{Hz}$ , $\text{CH}_3$ ); 0.85 (t, 3H, $J=6.3\text{Hz}$ , $\text{CH}_3$ ); 1.04-1.48 (m, 8H, 2 $\text{CH}_2(\text{CH}_2)_2\text{CH}_3$ ); 2.98-3.10 (m, 4H, 2 $\text{CH}_2(\text{CH}_2)_2\text{CH}_3$ ); 7.23-7.67 (m, 7H, Ar-H); 8.05-8.09 (m, 1H, 4-H); 12.40 (bs, 1H, NH, exch. with $\text{D}_2\text{O}$ ).                                              | 3180, 1610, 1590, 1420, 1200, 750. |
| 18 | $(\text{CH}_2)_5\text{CH}_3$ | $(\text{CH}_2)_5\text{CH}_3$ | F             | H | 0.74 (t, 3H, $J=6.5\text{Hz}$ , $\text{CH}_3$ ); 0.87 (t, 3H, $J=6.6\text{Hz}$ , $\text{CH}_3$ ); 1.06-1.50 (m, 16H, 2 $\text{CH}_2(\text{CH}_2)_4\text{CH}_3$ ); 2.88-3.07 (m, 4H, 2 $\text{CH}_2(\text{CH}_2)_4\text{CH}_3$ ); 7.20-7.68 (m, 7H, Ar-H); 8.03-8.07 (m, 1H, 4-H); 12.45 (bs, 1H, NH, exch. with $\text{D}_2\text{O}$ ).                                             | 3210, 1620, 1590, 1420, 1100, 670. |
| 19 | $(\text{CH}_2)_2\text{CH}_3$ | $(\text{CH}_2)_2\text{CH}_3$ | $\text{CH}_3$ | H | 0.65-0.80 (m, 6H, 2 $\text{CH}_3$ ); 1.13-1.24 (m, 2H, $\text{CH}_2\text{CH}_2\text{CH}_3$ ); 1.38-1.49 (m, 2H, $\text{CH}_2\text{CH}_2\text{CH}_3$ ); 2.39 (s, 3H, 4'- $\text{CH}_3$ ); 2.90-3.05 (m, 4H, 2 $\text{CH}_2\text{CH}_2\text{CH}_3$ ); 7.13-7.32 (m, 4H, Ar-H); 7.44-7.49 (m, 3H, Ar-H); 8.01-8.05 (m, 1H, 4-H); 12.39 (bs, 1H, NH, exch. with $\text{D}_2\text{O}$ ). | 3180, 1600, 1590, 1420, 1090, 740. |



|    |                              |                              |               |    |                                                                                                                                                                                                                                                                                                                                                                                                                 |                                    |
|----|------------------------------|------------------------------|---------------|----|-----------------------------------------------------------------------------------------------------------------------------------------------------------------------------------------------------------------------------------------------------------------------------------------------------------------------------------------------------------------------------------------------------------------|------------------------------------|
| 20 | $(\text{CH}_2)_3\text{CH}_3$ | $(\text{CH}_2)_3\text{CH}_3$ | $\text{CH}_3$ | H  | 0.72 (t, 3H, $J=7.2\text{Hz}$ , $\text{CH}_3$ ); 0.84 (t, 3H, $J=6.4\text{Hz}$ , $\text{CH}_3$ ); 1.03-1.44 (m, 8H, 2 $\text{CH}_2(\text{CH}_2)_2\text{CH}_3$ ); 2.39 (s, 3H, 4'- $\text{CH}_3$ ); 2.94-3.07 (m, 4H, 2 $\text{CH}_2(\text{CH}_2)_2\text{CH}_3$ ); 7.22-7.32 (m, 4H, Ar-H); 7.44-7.49 (m, 3H, Ar-H); 8.03-8.07 (m, 1H, 4-H); 12.37 (bs, 1H, NH, exch. with $\text{D}_2\text{O}$ ).               | 3200, 1610, 1590, 1420, 1100, 750. |
| 21 | $(\text{CH}_2)_5\text{CH}_3$ | $(\text{CH}_2)_5\text{CH}_3$ | $\text{CH}_3$ | H  | 0.74 (t, 3H, $J=6.6\text{Hz}$ , $\text{CH}_3$ ); 0.87 (t, 3H, $J=6.6\text{Hz}$ , $\text{CH}_3$ ); 1.06-1.39 (m, 16H, 2 $\text{CH}_2(\text{CH}_2)_4\text{CH}_3$ ); 2.38 (s, 3H, 4'- $\text{CH}_3$ ); 2.90-3.10 (m, 4H, 2 $\text{CH}_2(\text{CH}_2)_4\text{CH}_3$ ); 7.22-7.32 (m, 4H, Ar-H); 7.45-7.49 (m, 3H, Ar-H); 8.05-8.09 (m, 1H, 4-H); 12.39 (bs, 1H, NH, exch. with $\text{D}_2\text{O}$ ).              | 3220, 1610, 1580, 1420, 1100, 750. |
| 22 | $(\text{CH}_2)_2\text{CH}_3$ | $(\text{CH}_2)_2\text{CH}_3$ | H             | Cl | 0.66-0.78 (m, 6H, 2 $\text{CH}_3$ ); 1.13-1.31 (m, 2H, $\text{CH}_2\text{CH}_2\text{CH}_3$ ); 1.34-1.51 (m, 2H, $\text{CH}_2\text{CH}_2\text{CH}_3$ ); 2.90 (t, 2H, $J=7.7\text{Hz}$ , $\text{CH}_2\text{CH}_2\text{CH}_3$ ); 3.03 (t, 2H, $J=7.8\text{Hz}$ , $\text{CH}_2\text{CH}_2\text{CH}_3$ ); 7.31 (dd, 1H, $J=8.6, 2.2\text{Hz}$ , 6-H); 7.48-7.70 (m, 6H, Ar-H); 8.05 (d, 1H, $J=2.0\text{Hz}$ , 4-H). | 3170, 1610, 1580, 1420, 1100, 700. |
| 23 | $(\text{CH}_2)_3\text{CH}_3$ | $(\text{CH}_2)_3\text{CH}_3$ | H             | Cl | 0.70-0.91 (m, 6H, 2 $\text{CH}_3$ ); 1.04-1.44 (m, 8H, 2 $\text{CH}_2(\text{CH}_2)_2\text{CH}_3$ ); 2.95-3.08 (m, 4H, 2 $\text{CH}_2(\text{CH}_2)_2\text{CH}_3$ ); 7.31 (dd, 1H, $J=8.6, 2.1\text{Hz}$ , 6-H); 7.48-7.61 (m, 6H, Ar-H); 8.05 (d, 1H, $J=2.0\text{Hz}$ , 4-H); 12.65 (bs, 1H, NH, exch. with $\text{D}_2\text{O}$ ).                                                                             | 3180, 1620, 1590, 1380, 1100, 760. |
| 24 | $(\text{CH}_2)_5\text{CH}_3$ | $(\text{CH}_2)_5\text{CH}_3$ | H             | Cl | 0.74 (t, 3H, $J=6.2\text{Hz}$ , $\text{CH}_3$ ); 0.86 (t, 3H, $J=6.1\text{Hz}$ , $\text{CH}_3$ ); 1.07-1.42 (m, 16H, 2 $\text{CH}_2(\text{CH}_2)_4\text{CH}_3$ ); 2.96-3.08 (m, 4H, 2 $\text{CH}_2(\text{CH}_2)_4\text{CH}_3$ ); 7.31 (dd, 1H, $J=9.0, 1.8\text{Hz}$ , 6-H); 7.48-7.60 (m, 6H, Ar-H); 8.02 (d, 1H, $J=1.6\text{Hz}$ , 4-H); 12.72 (bs, 1H, NH, exch. with $\text{D}_2\text{O}$ ).               | 3200, 1610, 1580, 1420, 1100, 740. |

|    |                              |                              |    |    |                                                                                                                                                                                                                                                                                                                                                                                                                                         |                                    |
|----|------------------------------|------------------------------|----|----|-----------------------------------------------------------------------------------------------------------------------------------------------------------------------------------------------------------------------------------------------------------------------------------------------------------------------------------------------------------------------------------------------------------------------------------------|------------------------------------|
| 25 | $(\text{CH}_2)_2\text{CH}_3$ | $(\text{CH}_2)_2\text{CH}_3$ | Cl | Cl | 0.66-0.81 (m, 6H, 2 $\text{CH}_3$ ); 1.13-1.29 (m, 2H, $\text{CH}_2\text{CH}_2\text{CH}_3$ ); 1.39-1.52 (m, 2H, $\text{CH}_2\text{CH}_2\text{CH}_3$ ); 2.92-3.07 (m, 4H, 2 $\text{CH}_2\text{CH}_2\text{CH}_3$ ); 7.33 (dd, 1H, $J=8.5, 2.1\text{Hz}$ , 6-H); 7.51 (d, 1H, $J=8.6\text{Hz}$ , 7-H); 7.60-7.62 (m, 4H, ArH); 8.03 (d, 1H, $J=1.6\text{Hz}$ , 4-H); 12.74 (bs, 1H, NH, exch. with $\text{D}_2\text{O}$ ).                 | 3200, 1620, 1580, 1420, 1100, 720. |
| 26 | $(\text{CH}_2)_3\text{CH}_3$ | $(\text{CH}_2)_3\text{CH}_3$ | Cl | Cl | 0.74 (t, 3H, $J=7.2\text{Hz}$ , $\text{CH}_3$ ); 0.87 (t, 3H, $J=6.3\text{Hz}$ , $\text{CH}_3$ ); 1.05-1.50 (m, 8H, 2 $\text{CH}_2(\text{CH}_2)_2\text{CH}_3$ ); 2.90-3.08 (m, 4H, 2 $\text{CH}_2(\text{CH}_2)_2\text{CH}_3$ ); 7.33 (dd, 1H, $J=8.7, 2.1\text{Hz}$ , 6-H); 7.51 (d, 1H, $J=8.6\text{Hz}$ , 7-H); 7.59-7.62 (m, 4H, Ar-H); 8.05 (d, 1H, $J=2.2\text{Hz}$ , 4-H); 12.72 (bs, 1H, NH, exch. with $\text{D}_2\text{O}$ ).  | 3230, 1610, 1580, 1420, 1100, 730. |
| 27 | $(\text{CH}_2)_5\text{CH}_3$ | $(\text{CH}_2)_5\text{CH}_3$ | Cl | Cl | 0.75 (t, 3H, $J=6.6\text{Hz}$ , $\text{CH}_3$ ); 0.87 (t, 3H, $J=6.5\text{Hz}$ , $\text{CH}_3$ ); 1.07-1.41 (m, 16H, 2 $\text{CH}_2(\text{CH}_2)_4\text{CH}_3$ ); 2.99-3.07 (m, 4H, 2 $\text{CH}_2(\text{CH}_2)_4\text{CH}_3$ ); 7.32 (dd, 1H, $J=8.5, 1.9\text{Hz}$ , 6-H); 7.51 (d, 1H, $J=8.6\text{Hz}$ , 7-H); 7.55-7.65 (m, 4H, Ar-H); 8.03 (d, 1H, $J=1.8\text{Hz}$ , 4-H); 12.74 (bs, 1H, NH, exch. with $\text{D}_2\text{O}$ ). | 3210, 1630, 1600, 1420, 1100, 730. |

## 2. Biological Methods

**Materials.** [ $^3\text{H}$ ]PK 11195 (A.S. 85.5 Ci/mmol) and [ $^3\text{H}$ ]flumazenil (A.S. 78.6 Ci/mmol) were purchased from Perkin-Elmer Life Sciences. Culture medium, Fetal Bovine Serum (FBS), L-glutamine and antibiotics were purchased from Cambrex Bio Science. PK 11195 and Ro5-4864 were obtained from Sigma-Aldrich. 1,2,3,4-tetrahydro-4-oxo-7-chloro-2-naphthylpyridine (SU10603) and  $2\alpha,4\alpha,5\alpha,17\beta$ -4,5epoxy-17-hydroxy-3-oxoandrostane-2-carbonitrile (trilostane) were gifts from Novartis Farma S.p.a. and Dr D. Zister, University of Dublin, respectively. All other reagents were obtained from commercial suppliers.

### [ $^3\text{H}$ ]PK 11195 binding to rat kidney mitochondrial membranes

For binding studies, crude mitochondrial membranes were incubated with 0.6 nM [ $^3\text{H}$ ]PK 11195 in the presence of a range of concentrations of the tested compounds (0.1 nM-10  $\mu\text{M}$ ) in a total volume of 0.5 mL of Tris-HCl, pH 7.4, as previously described.<sup>10</sup> Drugs were dissolved in DMSO, and the level of this solvent did not exceed 0.5% and was maintained constant in all tubes. For the active compounds, the  $\text{IC}_{50}$  values were determined and  $\text{K}_i$  values were derived in accordance with the equation of Cheng and Prusoff.<sup>11</sup>

### [ $^3\text{H}$ ]Flumazenil binding to rat cerebral cortex membranes

Rat cerebral cortex membranes, subjected to washing procedures to remove endogenous GABA, were incubated with 0.2 nM [ $^3\text{H}$ ]flumazenil in the presence of the test compounds for 90 min at 0°C in 0.5 mL of 50 mM Tris-citrate buffer, pH 7.4, as previously described.<sup>12</sup>

### **Cell Culture**

Rat C6 glioma cells were cultured in Dulbecco's Modified Eagles Medium supplemented with 10 % FBS, 2 mM L-glutamine, 100 units/mL penicillin, and 100 µg/mL streptomycin. Cultures were maintained in a humidified atmosphere of 5% CO<sub>2</sub>/95% air at 37 °C.

### **Steroid Biosynthesis**

The measurement of pregnenolone production of C6 cells exposed to the novel compounds or PK 11195, Ro5-4864, or clonazepam (40 µM) was performed by radioimmunoassay (RIA), as previously described.<sup>10</sup>

## References

- (1) Grammaticakis, P. Medium Ultraviolet and Visible Absorption of N-aroarylaminines. II. Chloro- and Methylbenzoylarylamines. *Bull. Soc. Chim. Fr.* **1963**, 862-871.
- (2) Grammaticakis, P. Remarks about the Preparation and Ultraviolet Absorption of Some o-, m-, and p-Methylbenzoylarylamines. *Compt. Rend.* **1962**, 255, 1456-1458. Beilstein Registry Number 2647995.
- (3) Houlihan, W.J.; Parrino, V. A.; Uike, Y. Lithiation of N-(2-Alkylphenyl)alkanamides and Related Compounds. A Modified Madelung Indole Synthesis. *J. Org. Chem.* **1981**, 46, 4511-4515.
- (4) Dinnel, K.; Elliott, J. M.; Hollingworth, G. J.; Ridgill, M. P.; Shaw, D. E. Preparation of 2-Arylindole Derivatives for Use as Tachykinin Receptor Antagonists. U.S. Pat. Appl. Publ. 20010039286; *Chem. Abstr.* **2001**, 135, 357843.
- (5) El-Desoki, S. I.; Kandeel, E. M.; Abd-el-Rahman, A. H.; Schmidt, R. R. Synthesis and Reactions of 4H-3,1-Benzothiazines. *J. Heterocycl. Chem.* **1999**, 36, 153-160.
- (6) Brown, F.; Mann, F. G. Mechanism of Indole Formation from Phenacylarylamines. II. The Stability and Reaction of Phenacyl-N-alkylarylamines. *J. Chem. Soc.* **1948**, 847-858.
- (7) Julia, M.; Melamed, R.; Gombert, R. Research in the Indole Series. XVI. 2-Aryltryptamines and homologous Amines. *Ann. Inst. Pasteur* **1965**, 109(3), 343-362. Beilstein Registry Number 410984.
- (8) Joshi, K. C.; Pathak, V. N.; Singh R. P. Synthesis of some new Fluorine containing 3-Dialkylaminomethylindoles, 3-Indolyglyoxamides and tryptamines. *Monatsh. Chem.* **1980**, 111, 1343-1350.
- (9) Purohit, M. G.; Badiger, G. R.; Kalaskar, N. J. Synthesis and Antiserotonin Activity of Ethyl 5-O-(4-Methylpiperazin-1-ylacetyl)-2-methylindole-3-carboxylate and 3-(4-Methyl-1-piperazinyglyoxylyl)indoles. *Indian J. Chem. Sect. B.* **1995**, 34B(9), 796-801.

- (10) Selleri, S.; Bruni, F.; Costagli, C.; Costanzo, A.; Guerrini, G.; Ciciani, G.; Costa, B.; Martini, C. 2-Arylpirazolo[1,5-a]pyrimidin-3-yl Acetamides. New Potent and Selective Peripheral Benzodiazepine Receptor Ligands. *Bioorg. Med. Chem.* **2001**, *9*, 2661-2671.
- (11) Cheng, Y.; Prusoff, W.H. Relationship between constant ( $K_i$ ) and the concentration of inhibitor which causes 50 percent inhibition ( $IC_{50}$ ) of an enzymatic reaction. *Biochem. Pharmacol.* **1973**, *22*, 3099-3108.
- (12) Da Settimo, A.; Primofiore, G.; Da Settimo, F.; Marini, A.M.; Novellino, E.; Greco, G.; Gesi, M.; Martini, C.; Giannaccini, G.; Lucacchini, A. N'-Phenylindol-3-ylglyoxylohydrazide Derivatives: Synthesis, Structure-Activity Relationships, Molecular Modeling Studies, and Pharmacological Action on Brain Benzodiazepine Receptors. *J. Med. Chem.* **1998**, *41*, 3821-3830.
